# Supplementary material for: Extending the National Burned Area Composite Time Series of Wildfires in Canada
Source: MDPI journal article supplement (doi:10.3390/rs14133050), 2022-06-25
Supplement: s1 [file s1]

Supplementary Information (additional figures and tables) for the manuscript entitled  
 “Extending the National Burned Area Composite time series of wildfires in Canada”

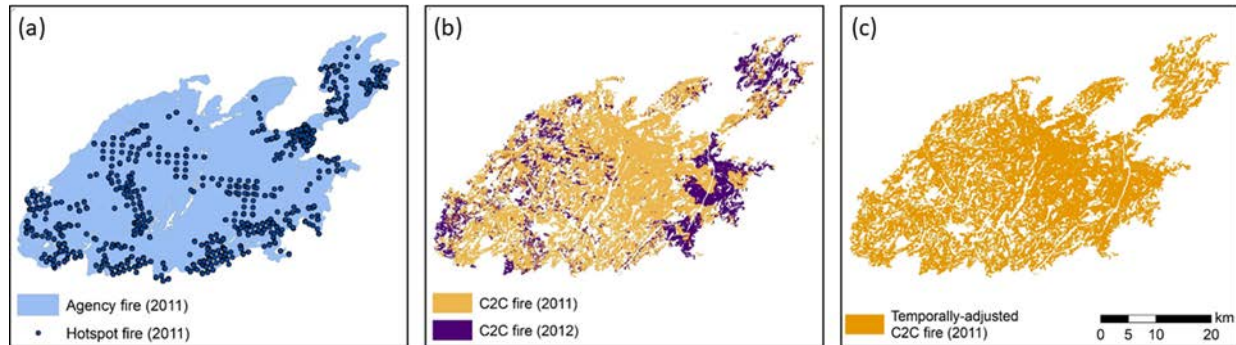

**Figure S1.** C2C “splitting” is where a fire event appears split in C2C into two or more events occurring over two consecutive years. In this example, a 2011 fire event is mapped by an agency polygon and hotspot points (a). C2C mapped the fire as occurring in 2011 and 2012 (b). A temporal adjustment to the 2012 portion of the C2C event corrected the year of the burn to 2011 (c). C2C = National Terrestrial Ecosystem Monitoring System Composite to Change.

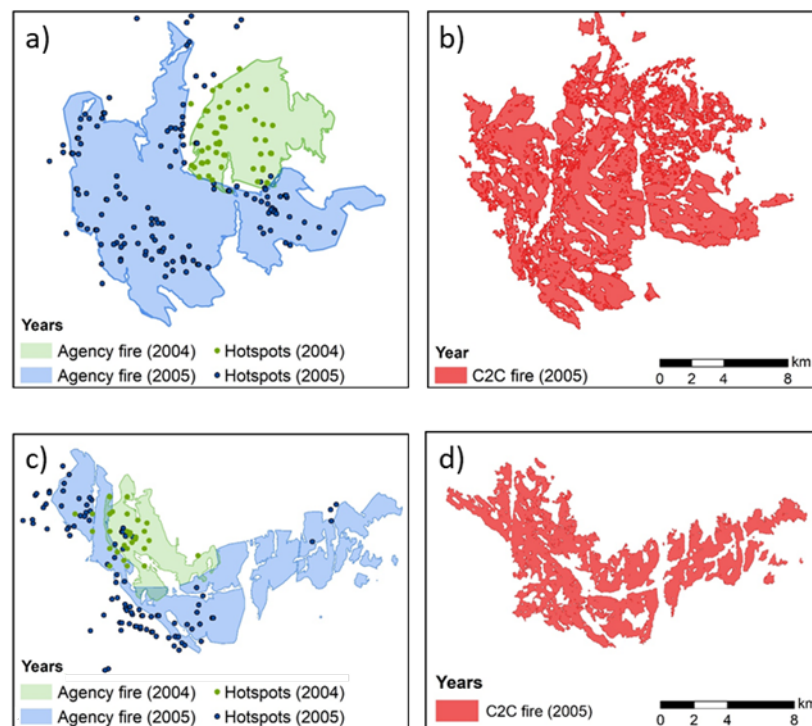

**Figure S2.** Two unrelated examples of C2C “lumping”, where two nearby fire events that occurred in consecutive years appear as a single fire event in C2C. Each row shows a 2004 fire event adjacent to a separate fire event in 2005, both assigned to the correct year by the fire agency as corroborated by

satellite hotspots (a, c). In contrast, C2C mapped the two events in each location as a single fire occurring in 2005 (b, d), which could not be temporally corrected in this study or used in NBAC. C2C = National Terrestrial Ecosystem Monitoring System Composite to Change. NBAC = National Burned Area Composite.

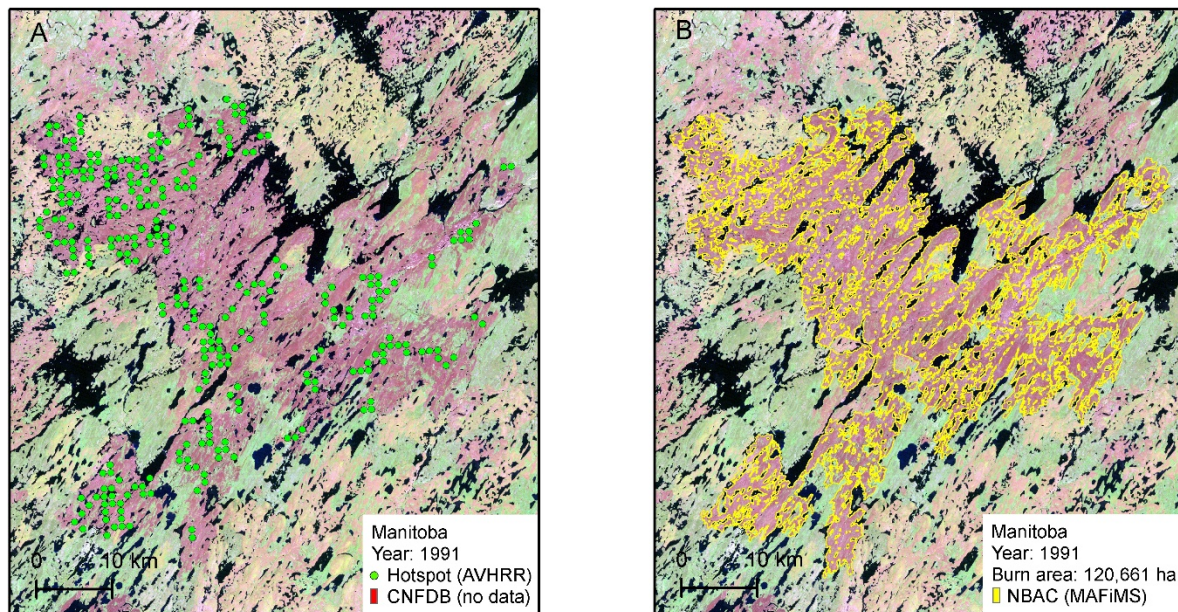

**Figure S3.** A fire event in Manitoba for year 1991 was detected using fire hotspots (green dots) from the AVHRR satellite, but was missed by the agency and not recorded in the CNFDB polygon or point data (A). In NBAC, this fire event was mapped with Landsat imagery (figure backdrop) using MAFiMS, resulting in 120,661 ha of previously unreported burned area (B). NBAC = National Burned Area Composite. AVHRR = Advanced Very High Resolution Radiometer; CNFDB = Canadian National Fire Database; MAFiMS = Multi-Acquisition Fire Mapping System.

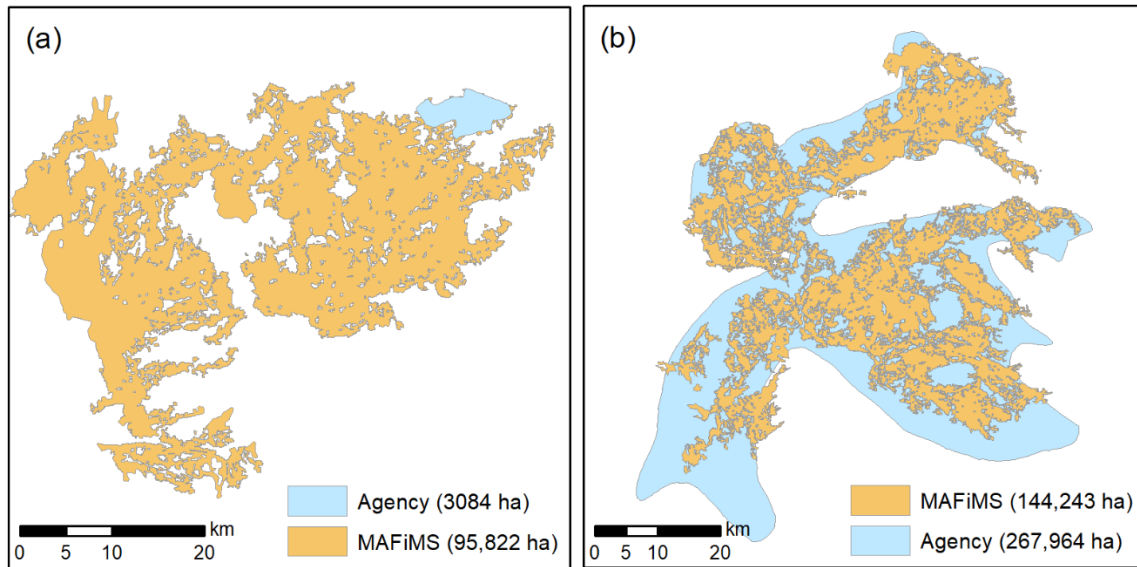

**Figure S4.** Examples of agency fire sketch maps that significantly underestimate (a) and overestimate (b) the area burned compared to delineations derived from MAFiMS in NBAC.

**Table S1.** Regional trends by ecozone of annual burned area according to NBAC and CNFDB for the period 1986 to 2020. Only those ecozones with significant trends ( $p < 0.1$ ) are shown. Ecozones map available from [https://en.wikipedia.org/wiki/Ecozones\\_of\\_Canada](https://en.wikipedia.org/wiki/Ecozones_of_Canada).

| Ecozone            | Slope (NBAC ; CNFDB) ha/year | <i>p</i> -value (NBAC ; CNFDB) |
|--------------------|------------------------------|--------------------------------|
| Atlantic Maritime  | -25.3 ; -12.1                | 0.09 ; 0.21                    |
| Boreal Plains      | 2796.5 ; 2051.4              | < 0.001 ; 0.27                 |
| Hudson Plains      | -1193.1 ; -1168.3            | 0.08 ; 0.08                    |
| Mixedwood Plains   | 1.3 ; 1.1                    | 0.02 ; 0.01                    |
| Montane Cordillera | 483.8 ; 553.2                | 0.03 ; 0.03                    |

**Table S2.** Annual statistics of fires in Canada 1986-2020 according to NBAC, including the estimated 95% confidence intervals lower and upper limits, and absolute and relative width.

| YEAR        | # Fires | NBAC (ha) | Low (ha)  | High (ha) | Width (ha) | PWidth (± %) |
|-------------|---------|-----------|-----------|-----------|------------|--------------|
| 1986        | 351     | 819,980   | 800,905   | 1,049,788 | 248,884    | 15.2         |
| 1987        | 533     | 884,694   | 849,420   | 1,246,246 | 396,826    | 22.4         |
| 1988        | 535     | 1,215,607 | 1,193,470 | 1,449,308 | 255,838    | 10.5         |
| 1989        | 1164    | 6,655,378 | 6,620,997 | 7,053,446 | 432,449    | 3.2          |
| 1990        | 507     | 857,772   | 833,173   | 1,099,190 | 266,017    | 15.5         |
| 1991        | 563     | 1,530,079 | 1,478,315 | 2,027,401 | 549,086    | 17.9         |
| 1992        | 327     | 863,984   | 844,656   | 994,206   | 149,550    | 8.7          |
| 1993        | 365     | 1,961,358 | 1,927,924 | 2,194,934 | 267,010    | 6.8          |
| 1994        | 700     | 5,025,823 | 4,945,497 | 5,559,770 | 614,273    | 6.1          |
| 1995        | 783     | 5,898,298 | 5,726,314 | 6,851,048 | 1,124,734  | 9.5          |
| 1996        | 801     | 1,761,957 | 1,687,578 | 2,281,611 | 594,033    | 16.9         |
| 1997        | 369     | 730,870   | 682,669   | 904,645   | 221,976    | 15.2         |
| 1998        | 1234    | 4,149,820 | 4,087,848 | 4,633,127 | 545,279    | 6.6          |
| 1999        | 889     | 1,650,995 | 1,580,731 | 2,195,789 | 615,058    | 18.6         |
| 2000        | 754     | 614,484   | 589,768   | 812,477   | 222,710    | 18.1         |
| 2001        | 798     | 540,578   | 504,086   | 850,811   | 346,725    | 32.1         |
| 2002        | 846     | 2,676,595 | 2,602,726 | 3,089,917 | 487,191    | 9.1          |
| 2003        | 1149    | 1,800,320 | 1,729,199 | 2,422,237 | 693,037    | 19.2         |
| 2004        | 874     | 2,854,128 | 2,757,655 | 3,144,301 | 386,646    | 6.8          |
| 2005        | 1128    | 1,628,412 | 1,585,856 | 1,776,610 | 190,754    | 5.9          |
| 2006        | 1538    | 1,879,308 | 1,856,685 | 2,081,365 | 224,680    | 6.0          |
| 2007        | 1180    | 1,548,225 | 1,520,659 | 1,921,298 | 400,639    | 12.9         |
| 2008        | 1246    | 1,392,034 | 1,368,136 | 1,470,845 | 102,709    | 3.7          |
| 2009        | 1172    | 754,800   | 738,881   | 828,275   | 89,394     | 5.9          |
| 2010        | 1601    | 2,884,729 | 2,847,473 | 2,963,308 | 115,835    | 2.0          |
| 2011        | 820     | 1,927,794 | 1,884,824 | 2,006,173 | 121,349    | 3.1          |
| 2012        | 1410    | 1,675,271 | 1,653,285 | 1,779,633 | 126,348    | 3.8          |
| 2013        | 1571    | 4,145,201 | 4,004,209 | 4,295,464 | 291,255    | 3.5          |
| 2014        | 1387    | 3,859,507 | 3,817,481 | 3,983,601 | 166,120    | 2.2          |
| 2015        | 1944    | 3,354,634 | 3,271,550 | 3,437,770 | 166,220    | 2.5          |
| 2016        | 924     | 1,219,799 | 1,175,731 | 1,276,518 | 100,788    | 4.1          |
| 2017        | 1398    | 3,047,985 | 2,964,817 | 3,150,332 | 185,515    | 3.0          |
| 2018        | 1574    | 1,862,402 | 1,811,956 | 1,979,666 | 167,710    | 4.5          |
| 2019        | 819     | 1,603,879 | 1,550,394 | 1,755,362 | 204,968    | 6.4          |
| 2020        | 554     | 215,797   | 202,117   | 246,111   | 43,994     | 10.2         |
| <b>Mean</b> | 966     | 2,156,928 | 2,105,628 | 2,423,217 | 317,589    | 9.7          |
| <b>Min</b>  | 327     | 215,797   | 202,117   | 246,111   | 43,994     | 2.0          |
| <b>Max</b>  | 1944    | 6,655,378 | 6,620,997 | 7,053,446 | 1,124,734  | 32.1         |

**Table S3.** Annual statistics of fires in Canada 1986-2020 according to CNFDB, including the estimated 95% confidence intervals (CIs) lower and upper limits, and absolute and relative width. PWidth size ratio indicates how many times the CIs in CNFDB are wider than those in NBAC.

| YEAR        | # Fires | CNFDB (ha) | Low (ha)  | High (ha) | Width (ha) | PWidth (± %) | PWidth (± %) size ratio* |
|-------------|---------|------------|-----------|-----------|------------|--------------|--------------------------|
| 1986        | 263     | 961,208    | 775,793   | 1,910,357 | 1,134,564  | 59.0         | 3.9                      |
| 1987        | 398     | 1,072,656  | 904,813   | 2,050,286 | 1,145,474  | 53.4         | 2.4                      |
| 1988        | 327     | 1,341,818  | 1,103,457 | 2,320,552 | 1,217,095  | 45.4         | 4.3                      |
| 1989        | 818     | 7,838,368  | 6,675,091 | 9,744,208 | 3,069,117  | 19.6         | 6.1                      |
| 1990        | 321     | 913,745    | 761,779   | 1,839,423 | 1,077,644  | 59.0         | 3.8                      |
| 1991        | 378     | 1,548,979  | 1,287,096 | 2,624,494 | 1,337,398  | 43.2         | 2.4                      |
| 1992        | 214     | 908,867    | 726,702   | 1,848,123 | 1,121,421  | 61.7         | 7.1                      |
| 1993        | 254     | 1,964,479  | 1,581,817 | 3,004,768 | 1,422,951  | 36.2         | 5.3                      |
| 1994        | 503     | 6,050,261  | 5,032,357 | 7,569,527 | 2,537,170  | 21.0         | 3.4                      |
| 1995        | 490     | 6,715,664  | 5,627,662 | 8,068,611 | 2,440,950  | 18.2         | 1.9                      |
| 1996        | 547     | 1,650,135  | 1,425,399 | 2,522,482 | 1,097,083  | 33.2         | 2.0                      |
| 1997        | 217     | 561,593    | 455,344   | 1,103,203 | 647,858    | 57.7         | 3.8                      |
| 1998        | 969     | 4,338,104  | 3,780,783 | 5,944,254 | 2,163,471  | 24.9         | 3.8                      |
| 1999        | 647     | 1,671,472  | 1,386,291 | 2,532,777 | 1,146,487  | 34.3         | 1.8                      |
| 2000        | 602     | 508,654    | 422,134   | 1,266,403 | 844,268    | 83.0         | 4.6                      |
| 2001        | 669     | 534,682    | 466,181   | 1,188,019 | 721,839    | 67.5         | 2.1                      |
| 2002        | 666     | 2,463,799  | 2,141,362 | 3,321,849 | 1,180,487  | 24.0         | 2.6                      |
| 2003        | 967     | 1,976,162  | 1,695,652 | 3,126,834 | 1,431,182  | 36.2         | 1.9                      |
| 2004        | 713     | 2,898,798  | 2,528,521 | 3,722,843 | 1,194,322  | 20.6         | 3.0                      |
| 2005        | 939     | 1,717,607  | 1,466,869 | 2,776,196 | 1,309,327  | 38.1         | 6.5                      |
| 2006        | 1382    | 1,784,726  | 1,516,138 | 2,467,855 | 951,717    | 26.7         | 4.5                      |
| 2007        | 1055    | 1,560,329  | 1,329,252 | 2,433,553 | 1,104,301  | 35.4         | 2.7                      |
| 2008        | 1152    | 1,668,764  | 1,386,999 | 2,369,268 | 982,269    | 29.4         | 7.9                      |
| 2009        | 1107    | 718,214    | 633,389   | 881,829   | 248,440    | 17.3         | 2.9                      |
| 2010        | 1581    | 2,880,326  | 2,467,878 | 3,659,728 | 1,191,851  | 20.7         | 10.4                     |
| 2011        | 785     | 2,252,037  | 1,990,250 | 3,214,094 | 1,223,843  | 27.2         | 8.8                      |
| 2012        | 1291    | 1,697,082  | 1,501,429 | 2,196,234 | 694,804    | 20.5         | 5.4                      |
| 2013        | 1440    | 3,933,991  | 3,576,692 | 4,388,778 | 812,086    | 10.3         | 2.9                      |
| 2014        | 1310    | 4,371,450  | 3,752,879 | 4,364,945 | 612,066    | 7.0          | 3.2                      |
| 2015        | 1941    | 3,649,382  | 3,231,252 | 3,804,860 | 573,608    | 7.9          | 3.2                      |
| 2016        | 923     | 1,292,155  | 1,153,623 | 1,487,531 | 333,908    | 12.9         | 3.1                      |
| 2017        | 1383    | 3,208,732  | 2,719,460 | 3,560,748 | 841,288    | 13.1         | 4.4                      |
| 2018        | 1521    | 1,977,211  | 1,668,570 | 2,794,323 | 1,125,753  | 28.5         | 6.3                      |
| 2019        | 735     | 1,262,356  | 1,155,019 | 2,070,112 | 915,093    | 36.2         | 5.7                      |
| 2020        | 534     | 159,307    | 139,513   | 199,279   | 59,766     | 18.8         | 1.8                      |
| <b>Mean</b> | 830     | 2,287,232  | 1,956,213 | 3,096,524 | 1,140,311  | 32.8         | 3.4                      |
| <b>Min</b>  | 214     | 159,307    | 139,513   | 199,279   | 59,766     | 7.0          | 1.8                      |

|            |      |           |           |           |           |      |      |
|------------|------|-----------|-----------|-----------|-----------|------|------|
| <b>Max</b> | 1941 | 7,838,368 | 6,675,091 | 9,744,208 | 3,069,117 | 83.0 | 10.4 |
|------------|------|-----------|-----------|-----------|-----------|------|------|

\* PWidth size ratio = CNFDB PWidth (± %) / NBAC PWidth (± %)
